# Supplementary material for: Hydroxychloroquine: Pharmacokinetics and Toxicity
Source: Hindawi journal article supplement (doi:10.1155/2024/6500340), 2024-01-01
Supplement: f1 [file 6500340.f1.zip]

Archive with 2 entries (2 files):
- Supplement material Table S1.docx
- Supplement material Table S2.docx
