# Supplementary material for: Hydroxychloroquine: Pharmacokinetics and Toxicity
Source: Hindawi journal article supplement (doi:10.1155/2024/6500340), 2024-01-01
Supplement: f1 [file 6500340.f1.zip › Supplement material Table S1.docx]

**Table S1: Statistics of HCQ serum concentrations in COVID-19 patients over time**

| Day | Number of  patients | Mean | Min | Lower  whisker | Q1 | Median | Q3 | Upper  whisker | Max |
| --- | --- | --- | --- | --- | --- | --- | --- | --- | --- |
| 1 | 56 | 0*.*10 | 0*.*00 | 0*.*00 | 0*.*06 | 0*.*09 | 0*.*14 | 0*.*24 | 0*.*31 |
| 2 | 297 | 0*.*20 | 0*.*00 | 0*.*00 | 0*.*11 | 0*.*17 | 0*.*26 | 0*.*48 | 0*.*80 |
| 3 | 124 | 0*.*23 | 0*.*00 | 0*.*00 | 0*.*12 | 0*.*21 | 0*.*29 | 0*.*49 | 0*.*74 |
| 4 | 127 | 0*.*38 | 0*.*02 | 0*.*02 | 0*.*22 | 0*.*32 | 0*.*45 | 0*.*79 | 1*.*12 |
| 5 | 75 | 0*.*39 | 0*.*00 | 0*.*00 | 0*.*26 | 0*.*36 | 0*.*50 | 0*.*74 | 0*.*97 |
| 6 | 64 | 0*.*48 | 0*.*01 | 0*.*01 | 0*.*29 | 0*.*44 | 0*.*64 | 1*.*15 | 1*.*19 |
| 7 | 31 | 0*.*57 | 0*.*13 | 0*.*13 | 0*.*38 | 0*.*52 | 0*.*70 | 1*.*14 | 1*.*27 |
| 8 | 41 | 0*.*57 | 0*.*00 | 0*.*00 | 0*.*38 | 0*.*57 | 0*.*73 | 1*.*09 | 1*.*37 |
| 9 | 20 | 0*.*65 | 0*.*23 | 0*.*23 | 0*.*43 | 0*.*54 | 0*.*89 | 1*.*31 | 1*.*31 |
| 10 | 138 | 0*.*71 | 0*.*00 | 0*.*00 | 0*.*47 | 0*.*65 | 0*.*91 | 1*.*44 | 1*.*97 |
| 11 | 15 | 0*.*85 | 0*.*24 | 0*.*24 | 0*.*56 | 0*.*71 | 1*.*16 | 1*.*85 | 1*.*85 |
| 12 | 40 | 0*.*52 | 0*.*00 | 0*.*00 | 0*.*27 | 0*.*46 | 0*.*67 | 0*.*96 | 1*.*72 |
| 13 | 33 | 0*.*49 | 0*.*03 | 0*.*03 | 0*.*28 | 0*.*50 | 0*.*69 | 1*.*16 | 1*.*16 |
| 14 | 111 | 0*.*39 | 0*.*00 | 0*.*00 | 0*.*23 | 0*.*36 | 0*.*49 | 0*.*83 | 1*.*45 |
| 15 | 55 | 0*.*36 | 0*.*00 | 0*.*00 | 0*.*23 | 0*.*32 | 0*.*44 | 0*.*67 | 1*.*32 |
| 16 | 20 | 0*.*31 | 0*.*00 | 0*.*00 | 0*.*13 | 0*.*26 | 0*.*41 | 0*.*63 | 1*.*21 |
| 17 | 11 | 0*.*26 | 0*.*00 | 0*.*00 | 0*.*06 | 0*.*14 | 0*.*40 | 0*.*53 | 1*.*02 |
| 18 | 7 | 0*.*08 | 0*.*00 | 0*.*00 | 0*.*03 | 0*.*05 | 0*.*11 | 0*.*24 | 0*.*24 |
| 19 | 5 | 0*.*12 | 0*.*00 | 0*.*00 | 0*.*00 | 0*.*11 | 0*.*15 | 0*.*35 | 0*.*35 |
| 20 | 4 | 0*.*08 | 0*.*03 | 0*.*03 | 0*.*03 | 0*.*06 | 0*.*10 | 0*.*16 | 0*.*16 |
| 21 | 4 | 0*.*13 | 0*.*00 | 0*.*00 | 0*.*02 | 0*.*12 | 0*.*24 | 0*.*28 | 0*.*28 |
| 22 | 3 | 0*.*15 | 0*.*00 | 0*.*00 | 0*.*01 | 0*.*02 | 0*.*23 | 0*.*44 | 0*.*44 |
| 23 | 3 | 0*.*09 | 0*.*05 | 0*.*05 | 0*.*07 | 0*.*09 | 0*.*11 | 0*.*12 | 0*.*12 |
