# Supplementary material for: Hydroxychloroquine: Pharmacokinetics and Toxicity
Source: Hindawi journal article supplement (doi:10.1155/2024/6500340), 2024-01-01
Supplement: f1 [file 6500340.f1.zip › Supplement material Table S2.docx]

**Table S2: HCQ serum concentrations for COVID-19 patients testing negative on day 2.**

|  | **Day 2** | **Day 3** | **Day 4** | **Day 5** | **Day 6** | **Day 8** | **Day 13** |
| --- | --- | --- | --- | --- | --- | --- | --- |
| Patient 1 | 0 |  | 0.191 |  |  |  |  |
| Patient 2 | 0 |  | 0.129 |  | 0.317 |  |  |
| Patient 3 | 0 |  |  |  |  |  | 0.229 |
| Patient 4 | 0 |  |  | 0.16 |  | 0.392 |  |
| Patient 5 | 0 |  |  |  |  |  |  |
| Patient 6 | 0 |  | 0.078 |  |  |  |  |
| Patient 7 | 0 |  |  |  |  |  |  |
| Patient 8 | 0 | 0,094 |  |  |  |  |  |
| Patient 9 | 0 |  |  |  |  |  |  |
